# Supplementary material
Source: HighWire-hosted journal article supplement (https://www.highwirestage.com/highwire/filestream/73775/field_highwire_adjunct_files/0/19-01284.pdf)
Supplement: 19-01284.pdf [file 19-01284.pdf]

**On-line Table: Risk factors for postcontrast acute kidney injury**

| Variables                                         | Univariable Analyses |                 |       | Multivariable Analyses |              |       |
|---------------------------------------------------|----------------------|-----------------|-------|------------------------|--------------|-------|
|                                                   | OR                   | 95% CI          | P     | OR                     | 95% CI       | P     |
| Age 65 yr or older                                | 1.535                | 0.791–2.979     | .205  |                        |              |       |
| Age 75 yr or older                                | 2.376                | 1.351–4.178     | .003  | 3.097                  | 1.568–6.114  | .001  |
| Hypertension                                      | 1.175                | 0.641–2.152     | .602  |                        |              |       |
| Diabetes mellitus                                 | 1.858                | 1.047–3.295     | .034  |                        |              |       |
| Chronic kidney disease                            | 6.988                | 3.114–15.683    | <.001 | 5.806                  | 2.218–15.201 | .001  |
| Hyperlipidemia                                    | 1.196                | 0.518–2.763     | .674  |                        |              |       |
| Liver cirrhosis                                   | <0.001               | <0.001–>999.999 | .989  |                        |              |       |
| Heart failure                                     | 0.778                | 0.270–2.244     | .642  |                        |              |       |
| Coronary artery occlusive disease                 | 1.352                | 0.655–2.791     | .415  |                        |              |       |
| Atrial fibrillation                               | 1.952                | 1.112–3.428     | .019  |                        |              |       |
| Hematologic disease                               | <0.001               | <0.001–>999.999 | .989  |                        |              |       |
| Malignancy                                        | 1.859                | 0.915–3.777     | .086  |                        |              |       |
| Other immune-suppression diseases                 | 3.079                | 0.970–9.778     | .056  |                        |              |       |
| Nonsteroidal anti-inflammatory drugs <sup>a</sup> | 1.959                | 0.550–6.983     | .299  |                        |              |       |
| ACEI/ARB <sup>a</sup>                             | 1.799                | 1.040–3.113     | .035  |                        |              |       |
| $\beta$ blocker <sup>a</sup>                      | 1.599                | 0.874–2.925     | .127  |                        |              |       |
| Statin <sup>a</sup>                               | 1.139                | 0.637–2.034     | .661  |                        |              |       |
| Insulin <sup>a</sup>                              | 1.197                | 0.147–9.741     | .866  |                        |              |       |
| Cyclosporine <sup>a</sup>                         | 0.677                | 0.087–5.238     | .708  |                        |              |       |
| Nonsteroidal anti-inflammatory drugs <sup>b</sup> | 3.002                | 1.402–6.431     | .004  | 6.399                  | 2.519–16.255 | <.001 |
| ACEI/ARB <sup>b</sup>                             | 3.107                | 1.529–6.312     | .001  | 2.742                  | 1.15–6.541   | .022  |
| $\beta$ blocker <sup>b</sup>                      | 2.176                | 1.223–3.872     | .008  | 2.805                  | 1.423–5.527  | .002  |
| Statin <sup>b</sup>                               | 0.201                | 0.111–0.365     | <.001 | 0.168                  | 0.084–0.336  | <.001 |
| Insulin <sup>b</sup>                              | 3.434                | 1.906–6.186     | <.001 | 2.68                   | 1.344–5.345  | .005  |
| Cyclosporine <sup>b</sup>                         | <0.001               | <0.001–>999.999 | .989  |                        |              |       |
| Proteinuria                                       | 2.777                | 1.455–5.299     | .001  |                        |              |       |
| White blood cells                                 | 0.986                | 0.902–1.079     | .765  |                        |              |       |
| Hemoglobin                                        | 0.833                | 0.727–0.954     | .008  |                        |              |       |
| Hematocrit                                        | 0.948                | 0.907–0.990     | .015  |                        |              |       |
| Red blood cell distribution width                 | 1.101                | 0.914–1.327     | .310  |                        |              |       |
| $\Delta$ neutrophil index                         | 1.194                | 1.018–1.399     | .028  |                        |              |       |
| Platelets                                         | 0.995                | 0.990–0.999     | .028  |                        |              |       |
| Neutrophil                                        | 1.013                | 0.929–1.106     | .763  |                        |              |       |
| Lymphocyte                                        | 0.922                | 0.695–1.224     | .573  |                        |              |       |
| Serum glucose level                               | 1.002                | 0.998–1.007     | .292  |                        |              |       |
| Blood urea nitrogen level                         | 1.017                | 0.985–1.049     | .302  |                        |              |       |
| Uric acid level                                   | 0.888                | 0.745–1.057     | .180  |                        |              |       |
| Total cholesterol level                           | 0.995                | 0.988–1.002     | .170  |                        |              |       |
| Albumin level                                     | 0.394                | 0.235–0.662     | .001  | 0.317                  | 0.169–0.595  | .001  |
| Serum sodium concentration                        | 0.915                | 0.838–0.999     | .048  |                        |              |       |
| International normalized ratio                    | 1.237                | 0.695–2.199     | .470  |                        |              |       |

**Note:**—ACEI indicates angiotensin-converting enzyme inhibitor; ARB, angiotensin II receptor blocker.

<sup>a</sup> Use before contrast media exposure.

<sup>b</sup> Use after contrast media exposure.
